# Supplementary material
Source: publisher figshare collection journal article supplement (https://gsapubs.figshare.com/ndownloader/files/23293040)
Supplement: Supplementary file 1 [file 23293040]

|        |        |        |      |     |    |       |        |        |       |            |            |   |    |    |       |                                                                                                                                                                                                                                                                                      |                          |
|--------|--------|--------|------|-----|----|-------|--------|--------|-------|------------|------------|---|----|----|-------|--------------------------------------------------------------------------------------------------------------------------------------------------------------------------------------------------------------------------------------------------------------------------------------|--------------------------|
| 4      | 140.02 | 53.54  | 5800 | 35  | 0  | 19470 | 359.72 | 363.72 | 437.3 | 441.3      | Drive Tube | 1 | 10 | 4  | S 2-2 | If drive tubes prove difficult, the sensors may all be placed in a shallow shoveled hole<br>Person responsible for drive tubes and seismic sensors joins after completion of those tasks<br>Install, level, and cover (mylar sheet or regolith backfill) seismic sensors, test power |                          |
|        | -75.71 |        |      |     |    |       |        |        |       | Suite      | Samples    | 2 | 35 |    | S 1-2 |                                                                                                                                                                                                                                                                                      |                          |
|        |        |        |      |     |    |       |        |        |       | Install    | Seismic    | 1 | 5  |    | E 1-2 |                                                                                                                                                                                                                                                                                      |                          |
| LS     |        | 32.22  | 3490 | 25  | 26 | 22960 | 416.94 | 446.94 | N/A   | N/A        | Flag       | 2 | 10 | LS |       | Video flag planting; Presidential phone call, etc.<br>Prioritize samples and remove any superfluous samples<br>Pack and seal sample collection; transfer to LM<br>Additional time to help set up LSEP if not complete.                                                               |                          |
|        |        |        |      |     |    |       |        |        |       | Downselect |            | 2 | 3  |    |       |                                                                                                                                                                                                                                                                                      |                          |
|        |        |        |      |     |    |       |        |        |       | Pack       |            | 2 | 12 |    |       |                                                                                                                                                                                                                                                                                      |                          |
|        |        |        |      |     |    |       |        |        |       | LSEP       |            |   | 26 |    |       |                                                                                                                                                                                                                                                                                      |                          |
| Totals |        | 126.18 |      | 145 | 30 | 22960 | 416.94 | 446.94 |       |            |            |   |    |    |       |                                                                                                                                                                                                                                                                                      | Station 2 is expendable. |

### Traverse Plans for Schrödinger Sortie Mission

| EVA         | TEAM 2           |                                 |                            |                 |                           |                      |                                    |                                     |                                                              |                                                                       |                  |             |                  |                     | EVA1 TEAM 2 |                                                   |                      |                                                                                                                                                                                                                                                       |  |  |
|-------------|------------------|---------------------------------|----------------------------|-----------------|---------------------------|----------------------|------------------------------------|-------------------------------------|--------------------------------------------------------------|-----------------------------------------------------------------------|------------------|-------------|------------------|---------------------|-------------|---------------------------------------------------|----------------------|-------------------------------------------------------------------------------------------------------------------------------------------------------------------------------------------------------------------------------------------------------|--|--|
| Site Number | Lat/Lon          | Travel time from previous (min) | Distance from previous (m) | Site Time (min) | Potential Extension (min) | Elapsed Distance (m) | Elapsed Time (min)<br>Max: 480 min | Extended Time (min)<br>Max: 480 min | Walkback Time (min)<br>(along route at 2.7 km/hr)<br>Elapsed | Extended Walkback Time (min)<br>(along route at 2.7 km/hr)<br>Elapsed | Sample/Activity* | Sample Type | Number of People | Activity Time (min) | Site Number | Objectives Addressed not correlated with activity | Justification/Notes: |                                                                                                                                                                                                                                                       |  |  |
| LS          |                  |                                 |                            | 200             | 15                        |                      | 200                                | 215                                 | N/A                                                          | N/A                                                                   | Unload           |             |                  | 2                   | 20          | LS                                                |                      | Reconnaissance, Installation - If scheduling conflicts arise, stops 1 and 3 may be skipped; Both EVA 4 routes will be altered to compensate for the loss of two short period seismic sensors. Team 2 will begin their EVA 15 minutes prior to Team 1. |  |  |
|             |                  |                                 |                            |                 |                           |                      |                                    |                                     |                                                              |                                                                       | LSEP             | Deploy      |                  | 2                   | 35          |                                                   |                      | Remove from LM                                                                                                                                                                                                                                        |  |  |
|             |                  |                                 |                            |                 |                           |                      |                                    |                                     |                                                              |                                                                       | Drill Core       | Core        |                  | 2                   | 25          |                                                   |                      | Carry to site and unpack the instruments; antennas and power; set up small experiments                                                                                                                                                                |  |  |
|             |                  |                                 |                            |                 |                           |                      |                                    |                                     |                                                              |                                                                       | Samples          | Hand        |                  | 1                   | 15          |                                                   |                      | depth: 3 m; person sampling will help extract the core; after extraction, insert Neutron Probe plus 10 min to assist in extracting core                                                                                                               |  |  |
|             |                  |                                 |                            |                 |                           |                      |                                    |                                     |                                                              |                                                                       | Heat Flow        | Probe       |                  | 1                   | 60          |                                                   |                      | depth: 2.3 m; 15 to drill each hole, 30 min to remove cores and emplace heat flow probes                                                                                                                                                              |  |  |
|             |                  |                                 |                            |                 |                           |                      |                                    |                                     |                                                              |                                                                       | ISRU             | Deploy      |                  | 1                   | 60          |                                                   |                      | Deploy, power, and test; process samples from first EVA (leave running during crew rest)                                                                                                                                                              |  |  |
|             |                  |                                 |                            |                 |                           |                      |                                    |                                     |                                                              |                                                                       | Rover            |             |                  | 2                   | 40          |                                                   |                      | 25 min to unpack, 15 min for test drive; install camera/lights, geology package                                                                                                                                                                       |  |  |
| 1           | 139.84<br>-75.8  | 32.22                           | 3490                       | 53              | 0                         | 3490                 | 285.22                             | 300.22                              | 439.2                                                        | 454.2                                                                 | Drive Tube       |             |                  | 1                   | 10          | 1                                                 | S 2-2                |                                                                                                                                                                                                                                                       |  |  |
|             |                  |                                 |                            |                 |                           |                      |                                    |                                     |                                                              |                                                                       | Suite            | Samples     |                  | 2                   | 40          |                                                   | S 1-2                | Person responsible for drive tubes and seismic sensors joins after completion of those tasks                                                                                                                                                          |  |  |
|             |                  |                                 |                            |                 |                           |                      |                                    |                                     |                                                              |                                                                       | Install          | Seismic     |                  | 1                   | 15          |                                                   | E 1-2                | Install, level, and cover (mylar sheet or regolith backfill) seismic sensors (broadband and S.P.)                                                                                                                                                     |  |  |
|             |                  |                                 |                            |                 |                           |                      |                                    |                                     |                                                              |                                                                       | Bulk             | Shovel      |                  | 1                   | 3           |                                                   |                      | Dig hole (1m x 1m x 0.5m) to characterize regolith; bulk sample used for ISRU (part of Suite)                                                                                                                                                         |  |  |
| 2           | 139.31<br>-75.76 | 38.40                           | 4160                       | 35              | 15                        | 7650                 | 358.62                             | 388.62                              | 420.2                                                        | 450.2                                                                 | Drive Tube       |             |                  | 1                   | 10          | 2                                                 | S 2-2                |                                                                                                                                                                                                                                                       |  |  |
|             |                  |                                 |                            |                 |                           |                      |                                    |                                     |                                                              |                                                                       | Suite            | Samples     |                  | 2                   | 35          |                                                   | S 1-2                | Person responsible for drive tubes and seismic sensors joins after completion of those tasks                                                                                                                                                          |  |  |
|             |                  |                                 |                            |                 |                           |                      |                                    |                                     |                                                              |                                                                       | Install          | Seismic     |                  | 1                   | 5           |                                                   | E 1-2                | Install, level, and cover (mylar sheet or regolith backfill) seismic sensors, test power                                                                                                                                                              |  |  |
| LS          |                  | 25.57                           | 2770                       | 30              | 0                         | 10420                | 414.18                             | 444.18                              | N/A                                                          | N/A                                                                   | ISRU             | Test        |                  | 1                   | 15          | LS                                                | E 1-1                | Load bulk materials into ISRU package; test working capability, run during crew rest                                                                                                                                                                  |  |  |
|             |                  |                                 |                            |                 |                           |                      |                                    |                                     |                                                              |                                                                       | Flag             |             |                  | 2                   | 10          |                                                   |                      | Video flag planting; Presidential phone call, etc.                                                                                                                                                                                                    |  |  |
|             |                  |                                 |                            |                 |                           |                      |                                    |                                     |                                                              |                                                                       | Downselect       |             |                  | 1                   | 3           |                                                   |                      | Prioritize samples and remove any superfluous samples                                                                                                                                                                                                 |  |  |
|             |                  |                                 |                            |                 |                           |                      |                                    |                                     |                                                              |                                                                       | Pack             |             |                  | 1                   | 12          |                                                   |                      | Pack and seal sample collection; transfer to LM                                                                                                                                                                                                       |  |  |
| Totals      |                  | 96.18                           |                            | 318             | 30                        | 10420                | 414.18                             | 444.18                              |                                                              |                                                                       |                  |             |                  |                     |             |                                                   |                      | Traverse route can be reversed to allow for "rescue" opportunity if Team 1 is in distress.                                                                                                                                                            |  |  |

### Traverse Plans for Schrödinger Sortie Mission

#### EVA1 TEAM 2

Traverse Plans for Schrödinger Sortie Mission

| EVA2<br>Number | TEAM 1<br>Site<br>Lat/Lon | Travel<br>time<br>from<br>previous<br>(min) | Distance<br>from<br>previous<br>(m) | Site<br>Time<br>(min) | Potential<br>Extension<br>(min) | Elapsed<br>Distance<br>(m) | Elapsed<br>Time<br>(min)<br>Max:<br>480 min | Extended<br>Time<br>(min)<br>Max:<br>480 min | Walkback<br>Time<br>(min)<br>(along<br>route at<br>2.7 km/hr)<br>Elapsed | Extended<br>Walkback<br>(min)<br>(along<br>route at<br>2.7 km/hr)<br>Elapsed | Sample/<br>Activity*                    | Sample<br>Type                    | Number<br>of<br>People | Activity<br>Time<br>(min) | Site<br>Number | Objectives<br>Addressed<br>not<br>correlated<br>with activity |
|----------------|---------------------------|---------------------------------------------|-------------------------------------|-----------------------|---------------------------------|----------------------------|---------------------------------------------|----------------------------------------------|--------------------------------------------------------------------------|------------------------------------------------------------------------------|-----------------------------------------|-----------------------------------|------------------------|---------------------------|----------------|---------------------------------------------------------------|
|                |                           |                                             |                                     |                       |                                 |                            |                                             |                                              |                                                                          |                                                                              |                                         |                                   |                        |                           |                |                                                               |
| 1              | 139.29<br>-75.39          | 96.00                                       | 10400                               | 75                    | 15                              | 10400                      | 171.00                                      | 186.00                                       | 449.4                                                                    | 464.4                                                                        | Drill Core<br>Suite<br>Sample<br>Sample | Core<br>Samples<br>Drag<br>Trench | 2<br>2<br>1<br>1       | 25<br>45<br>5<br>5        | 1              | S 1-2<br>S 1-3                                                |
| 2              | 141.43<br>-75.68          | 21.51                                       | 2330                                | 45                    | 8                               | 12730                      | 237.51                                      | 260.51                                       | 464.2                                                                    | 487.2                                                                        | Suite<br>Bulk                           | Samples<br>Shovel                 | 2<br>1                 | 45<br>5                   | 2              | S 1-2<br>S 1-3<br>E 1-2                                       |
| 3              | 139.41<br>-75.48          | 24.00                                       | 2600                                | 30                    | 0                               | 15330                      | 291.51                                      | 314.51                                       | 460.4                                                                    | 483.4                                                                        | Suite<br>Bulk                           | Samples<br>Shovel                 | 2<br>1                 | 30<br>10                  | 3              | S 1-2<br>E 1-2                                                |
| 4              | 139.48<br>-75.6           | 35.54                                       | 3850                                | 30                    | 0                               | 19180                      | 357.05                                      | 380.05                                       | 440.4                                                                    | 463.4                                                                        | Suite<br>Sample                         | Samples<br>Trench                 | 2<br>2                 | 30<br>5                   | 4              | S 1-1<br>S 1-2                                                |
| LS             |                           | 34.62                                       | 3750                                | 30                    | 5                               | 22930                      | 421.66                                      | 449.66                                       | N/A                                                                      | N/A                                                                          | ISRU<br>Downselect<br>Pack              |                                   | 2<br>2<br>2            | 15<br>3<br>12             | LS             | E 1-1                                                         |
| Totals         |                           | 211.66                                      |                                     | 210                   | 28                              | 22930                      | 421.66                                      | 449.66                                       |                                                                          |                                                                              |                                         |                                   |                        |                           |                |                                                               |

Traverse Plans for Schrödinger Sortie Mission

| EVA2 TEAM 1 |  | Justification/Notes:                                                                                                                                                                              |
|-------------|--|---------------------------------------------------------------------------------------------------------------------------------------------------------------------------------------------------|
|             |  | Vent; Time for LRV samples of opportunity ~15mins<br>depth: 3 m; person sampling will help extract the core                                                                                       |
|             |  | Dig hole (1m x 1m x 0.5m) to characterize regolith; bulk sample used for ISRU                                                                                                                     |
|             |  | Dig hole (1m x 1m x 0.5m) to characterize regolith; bulk sample used for ISRU                                                                                                                     |
|             |  |                                                                                                                                                                                                   |
|             |  | Load bulk materials into ISRU package; test working capabillity, run during crew rest<br>Prioritize samples and remove any superfluous samples<br>Pack and seal sample collection; transfer to LM |

Traverse Plans for Schrödinger Sortie Mission

| EVA2   | TEAM 2  |          |          |       |           |          |         |          |            |            |           |         |        |          |        |               |
|--------|---------|----------|----------|-------|-----------|----------|---------|----------|------------|------------|-----------|---------|--------|----------|--------|---------------|
| Site   | Lat/Lon | Travel   | Distance | Site  | Potential | Elapsed  | Elapsed | Extended | Walkback   | Extended   | Sample/   | Sample  | Number | Activity | Site   | Objectives    |
| Number |         | time     | from     | Time  | Extension | Distance | Time    | Time     | Time       | Walkback   | Activity* | Type    | of     | Time     | Number | Addressed     |
|        |         | from     | previous | (min) | (min)     | (m)      | (min)   | (min)    | (min)      | (min)      |           |         | People | (min)    |        | not           |
|        |         | previous | (m)      |       |           |          | Max:    | Max:     | (along     | (along     |           |         |        |          |        | correlated    |
|        |         | (min)    |          |       |           |          | 480 min | 480 min  | route at   | route at   |           |         |        |          |        | with activity |
|        |         |          |          |       |           |          |         |          | 2.7 km/hr) | 2.7 km/hr) |           |         |        |          |        |               |
|        |         |          |          |       |           |          |         |          | Elapsed    | Elapsed    |           |         |        |          |        |               |
| 1      | 138.35  | 86.86    | 9410     | 55    | 5         | 9410     | 141.86  | 146.86   | 472.8      | 477.8      | Suite     | Samples | 2      | 45       | 1      | S 1-2         |
|        | -75.65  |          |          |       |           |          |         |          |            |            | Sample    | Drag    | 1      | 5        |        | S 1-3         |

Traverse Plans for Schrödinger Sortie Mission

| EVA2 TEAM 2 |  | Justification/Notes:                                            |
|-------------|--|-----------------------------------------------------------------|
|             |  | Fracture and Crater; Time for LRV samples of opportunity ~20min |



|        |        |      |     |    |       |        |        |     |     |            |   |    |    |       |                                                                                      |
|--------|--------|------|-----|----|-------|--------|--------|-----|-----|------------|---|----|----|-------|--------------------------------------------------------------------------------------|
| LS     | 41.77  | 4525 | 30  | 5  | 23215 | 419.29 | 449.29 | N/A | N/A | ISRU       | 2 | 15 | LS | E 1-3 | Load bulk materials into ISRU package; test working capability, run during crew rest |
|        |        |      |     |    |       |        |        |     |     | Downselect | 2 | 3  |    | E 2-2 | Prioritize samples and remove any superfluous samples                                |
|        |        |      |     |    |       |        |        |     |     | Pack       | 2 | 12 |    |       | Pack and seal sample collection; transfer to LM                                      |
| Totals | 214.29 |      | 205 | 30 | 23215 | 419.29 | 449.29 |     |     |            |   |    |    |       |                                                                                      |

### Traverse Plans for Schrödinger Sortie Mission

| EVA3 TEAM 2 |               |                     |                            |                 |                           |                      |                    |                     |                                    |                                    |                          |                |                  |                     |             | EVA3 TEAM 2                                       |                                                                                                                                                                                                  |  |
|-------------|---------------|---------------------|----------------------------|-----------------|---------------------------|----------------------|--------------------|---------------------|------------------------------------|------------------------------------|--------------------------|----------------|------------------|---------------------|-------------|---------------------------------------------------|--------------------------------------------------------------------------------------------------------------------------------------------------------------------------------------------------|--|
| Site Number | Lat/Lon       | Travel time         | Distance from previous (m) | Site Time (min) | Potential Extension (min) | Elapsed Distance (m) | Elapsed Time (min) | Extended Time (min) | Walkback Time (min)                | Extended Walkback Time (min)       | Sample/Activity*         | Sample Type    | Number of People | Activity Time (min) | Site Number | Objectives Addressed not correlated with activity | Justification/Notes:                                                                                                                                                                             |  |
|             |               | from previous (min) |                            |                 |                           |                      | Max: 480 min       | Max: 480 min        | (along route at 2.7 km/hr) Elapsed | (along route at 2.7 km/hr) Elapsed |                          |                |                  |                     |             |                                                   |                                                                                                                                                                                                  |  |
| 1           | 140.78 -75.83 | 89.35               | 9680                       | 75              | 15                        | 9680                 | 164.35             | 179.35              | 403.9                              | 418.9                              | Drill Core Suite         | Core Samples   | 2                | 25                  | 1           | S 1-1<br>S 1-4                                    | depth: 3 m; person sampling will help extract the core                                                                                                                                           |  |
|             |               |                     |                            |                 |                           |                      |                    |                     |                                    |                                    |                          |                | 2                | 50                  |             |                                                   |                                                                                                                                                                                                  |  |
| 2           | 140.63 -75.84 | 10.71               | 1160                       | 40              | 5                         | 10840                | 215.06             | 235.06              | 428.8                              | 448.8                              | Suite                    | Samples        | 2                | 40                  | 2           | S 1-1<br>S 1-4                                    |                                                                                                                                                                                                  |  |
| 3           | 140.43 -75.87 | 15.23               | 1650                       | 40              | 5                         | 12490                | 270.29             | 295.29              | 447.4                              | 472.4                              | Suite Bulk               | Samples Shovel | 2                | 40                  | 3           | S 1-1<br>E 1-2<br>S 1-4                           | Multiple shovel scoops of pyroclastics (majority used for ISRU; portion for sample return)                                                                                                       |  |
|             |               |                     |                            |                 |                           |                      |                    |                     |                                    |                                    |                          |                | 1                | 5                   |             |                                                   |                                                                                                                                                                                                  |  |
| 4           | 140.25 -75.86 | 12.37               | 1340                       | 45              | 5                         | 13830                | 327.66             | 357.66              | 475.0                              | 505.0                              | Suite Drive Tube Install | Samples        | 2                | 35                  | 4           | S 1-1<br>S 1-4                                    |                                                                                                                                                                                                  |  |
|             |               |                     |                            |                 |                           |                      |                    |                     |                                    |                                    |                          |                | 1                | 10                  |             |                                                   |                                                                                                                                                                                                  |  |
|             |               |                     |                            |                 |                           |                      |                    |                     |                                    |                                    |                          | Seismic        | 1                | 5                   |             |                                                   | Install, level, and cover (mylar sheet or regolith backfill) seismic sensors, test power                                                                                                         |  |
| LS          |               | 61.20               | 6630                       | 30              | 0                         | 20460                | 418.86             | 448.86              | N/A                                | N/A                                | ISRU                     |                | 2                | 15                  | LS          | E 1-3<br>E 2-2                                    | Load bulk materials into ISRU package; test working capability, run during crew rest<br>Prioritize samples and remove any superfluous samples<br>Pack and seal sample collection; transfer to LM |  |
|             |               |                     |                            |                 |                           |                      |                    |                     |                                    |                                    | Downselect               |                | 2                | 3                   |             |                                                   |                                                                                                                                                                                                  |  |
|             |               |                     |                            |                 |                           |                      |                    |                     |                                    |                                    | Pack                     |                | 2                | 12                  |             |                                                   |                                                                                                                                                                                                  |  |
| Totals      | 188.86        |                     |                            | 230             | 30                        | 20460                | 418.86             | 448.86              |                                    |                                    |                          |                |                  |                     |             |                                                   |                                                                                                                                                                                                  |  |

### Traverse Plans for Schrödinger Sortie Mission
